# Supplementary material
Source: HighWire-hosted journal article supplement (https://thorax.bmj.com/content/thoraxjnl-2017-210899)
Supplement: inline-supplementary-material-3 [file inline-supplementary-material-3.pdf]

**Supplementary table S1. Characteristics of the Canadian contemporary patients with cystic fibrosis at the first measurement after January 1, 2008**

| <b>Patient characteristics (N = 3,784)</b> |                                                      | <b>Male</b>   | <b>Female</b> | <b>Total</b>  |
|--------------------------------------------|------------------------------------------------------|---------------|---------------|---------------|
| <b>Age (years)</b>                         | <i>6 - 10</i>                                        | 548 (26.7%)   | 505 (29.1%)   | 1,053 (27.8%) |
|                                            | <i>11 - 20</i>                                       | 304 (14.8%)   | 270 (15.6%)   | 574 (15.2%)   |
|                                            | <i>21 - 25</i>                                       | 307 (15.0%)   | 291 (16.8%)   | 598 (15.8%)   |
|                                            | <i>26 - 30</i>                                       | 276 (13.5%)   | 204 (11.8%)   | 480 (12.7%)   |
|                                            | <i>31 - 35</i>                                       | 180 (8.8%)    | 164 (9.4%)    | 344 (9.1%)    |
|                                            | <i>36 - 40</i>                                       | 187 (9.1%)    | 116 (6.7%)    | 303 (8.0%)    |
|                                            | <i>41 - 45</i>                                       | 111 (5.4%)    | 76 (4.4%)     | 187 (4.9%)    |
|                                            | <i>40 &gt;</i>                                       | 137 (6.7%)    | 108 (6.2%)    | 245 (6.5%)    |
| <b>Sex</b>                                 |                                                      | 2,050 (54.2%) | 1,734 (45.8%) | 3,784         |
| <b>Ethnicity</b>                           | <i>Caucasian</i>                                     | 1,904 (92.9%) | 1,626 (93.8%) | 3,530 (93.3%) |
|                                            | <i>Other</i>                                         | 99 (4.8%)     | 70 (4.0%)     | 169 (4.5%)    |
|                                            | <i>Unknown</i>                                       | 47 (2.3%)     | 38 (2.2%)     | 85 (2.2%)     |
| <b>Genotype</b>                            | <i>Homozygous <math>\Delta F508</math></i>           | 996 (48.6%)   | 831 (47.9%)   | 1,827 (48.3%) |
|                                            | <i>Heterozygous <math>\Delta F508</math> / Other</i> | 1,011 (49.3%) | 876 (50.5%)   | 1,887 (49.8%) |
|                                            | <i>Unknown</i>                                       | 43 (2.1%)     | 27 (1.6%)     | 70 (1.8%)     |
| <b>BMI</b>                                 | <i>Underweight</i>                                   | 192 (9.4%)    | 149 (8.6%)    | 341 (9.0%)    |
| <b>Category*</b>                           | <i>Normal</i>                                        | 1,582 (77.2%) | 1,334 (76.9%) | 2,916 (77.1%) |
|                                            | <i>Overweight</i>                                    | 275 (13.4%)   | 247 (14.2%)   | 522 (13.8%)   |
|                                            | <i>Unknown</i>                                       | 1 (0.0%)      | 4 (0.2%)      | 5 (0.1%)      |

BMI = Body Mass Index.

\* BMI category based on World Health Organization guidelines[13]:

- Underweight: < 18.50 kg/m<sup>2</sup>
- Normal range: 18.50 - 24.99 kg/m<sup>2</sup>
- Overweight: ≥ 25.00 kg/m<sup>2</sup>
- Obese: ≥ 30.00 kg/m<sup>2</sup>
